# Supplementary material for: Measurement report: Volatile organic compound characteristics of the different land-use types in Shanghai: spatiotemporal variation, source apportionment and impact on secondary formations of ozone and aerosol
Source: Copernicus journal article supplement (doi:10.5194/acp-23-2877-2023), 2023-03-03
Supplement: Supplementary file 1 [file acp-23-2877-2023-supplement.pdf]

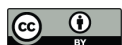

*Supplement of*

**Measurement report: Volatile organic compound characteristics of the different land-use types in Shanghai: spatiotemporal variation, source apportionment and impact on secondary formations of ozone and aerosol**

**Yu Han et al.**

*Correspondence to:* Hongbo Fu (fuhb@fudan.edu.cn)

The copyright of individual parts of the supplement might differ from the article licence.

**Table S1. The sources and land-use type at the sampling sites.**

| Sites             | Land-use type                              | Details                                           | References           |
|-------------------|--------------------------------------------|---------------------------------------------------|----------------------|
| Jinshan Site (JS) | Industrial district                        | Surrounded by chemical factories                  | Zhang et al., (2018) |
| Pudong Site (PD)  | Residential and commercial mixed districts | Surrounded by residences and administrative areas | Cai et al., (2010b)  |
| Qingpu Site (QP)  | Background district                        | Surrounded by farmlands and forests               | Zhang et al., (2020) |

**Table S2. MIR and MDL of measured VOCs species at three sampling sites.**

| Species                  | MIR   | MDL (ppb) |
|--------------------------|-------|-----------|
| ethane                   | 0.28  | 0.74      |
| propane                  | 0.49  | 0.11      |
| iso-butane               | 1.23  | 0.10      |
| n-butane                 | 1.15  | 0.11      |
| iso-pentane              | 1.45  | 0.03      |
| n-pentane                | 1.31  | 0.05      |
| n-hexane                 | 1.24  | 0.18      |
| 2, 4-dimethylpentane     | 1.46  | 0.06      |
| cyclohexane              | 1.25  | 0.06      |
| 2, 2, 4-trimethylpentane | 1.26  | 0.17      |
| 2, 3, 4-trimethylpentane | 1.60  | 0.05      |
| n-heptane                | 1.07  | 0.55      |
| 2-methylheptane          | 1.07  | 0.14      |
| 3-methylheptane          | 1.24  | 0.15      |
| octane                   | 0.90  | 0.13      |
| n-nonane                 | 0.78  | 0.09      |
| ethylene                 | 7.40  | 0.60      |
| propylene                | 11.66 | 0.24      |
| trans-2-butene           | 15.16 | 0.14      |
| cis-2-butene             | 14.24 | 0.04      |
| 1-amylene                | 7.21  | 0.07      |
| trans-2-amylene          | 10.56 | 0.09      |
| cis-2-2amylene           | 14.24 | -         |
| isoprene                 | 10.61 | 0.09      |
| 1-hexene                 | 5.35  | 0.11      |
| 1, 3-butadiene           | 12.61 | 0.17      |
| benzene                  | 0.72  | 0.11      |
| toluene                  | 4.00  | 0.14      |
| ethylbenzene             | 3.04  | 0.04      |
| m/p-xylene               | 7.40  | 0.09      |
| o-xylene                 | 7.64  | 0.08      |
| styrene                  | 1.73  | 0.06      |
| isopropylbenzene         | 2.52  | 0.12      |
| n-propylbenzene          | 2.03  | 0.07      |
| m-ethyltoluene           | 7.39  | 0.15      |
| p-ethyltoluene           | 4.44  | 0.15      |
| o-ethyltoluene           | 5.59  | 0.10      |
| 1, 3, 5-trimethylbenzene | 11.76 | 0.09      |
| 1, 2, 4-trimethylbenzene | 8.87  | 0.12      |
| 1, 2, 3-trimethylbenzene | 11.97 | 0.13      |
| m-diethylbenzene         | 7.10  | 0.19      |
| p-diethylbenzene         | 4.43  | 0.23      |
| ethyne                   | 0.95  | 0.27      |

**Table S3. Comparison of TVOCs, OFP and SOAFP with other cities.**

| Sampling location | Site type                        | Sampling time        | Quantifies species | TVOCs (ppb)               | OFP (ppb)                   | SOAFP ( $\mu\text{g m}^{-3}$ ) | References             |
|-------------------|----------------------------------|----------------------|--------------------|---------------------------|-----------------------------|--------------------------------|------------------------|
| Shanghai          | Industrial area                  | Nov. 2013-Jan. 2014  | 69                 | 94.14                     | 220.49                      | -                              | Zhang et al. (2018)    |
| Shanghai          | Dianshan Lake                    | Apr. 7-Sep. 25, 2018 | 55                 | 15.41                     | -                           | -                              | Zhang et al. (2020a)   |
| Jinan             | Suburban area                    | 2014                 | 56                 | 50.58                     | -                           | 0.2-5.56                       | Zhang et al. (2017)    |
| Wuhan             | Urban area                       | Sep. 2016-Aug. 2017  | 58                 | 34.65                     | 7.81-634.27                 | -                              | Hui et al. (2018)      |
| Taiwan            | Industrial and urban area        | Feb. 2017            | 109                | 36-327                    | 66-831                      | 0.12-5.55                      | Vo et al. (2018)       |
| Nanjing           | Industrial area                  | Mar. 2011-Feb. 2012  | 56                 | 43.5                      | -                           | -                              | An et al. (2017)       |
| Nanjing           | Suburban area                    | Jul. 2018            | 89                 | 35                        | 86.62                       | 0.36                           | Mozaffar et al. (2020) |
| Xi'an             | 20 sites                         | Jun.-Jul. 2019       | 106                | 29.1                      | 53.9                        | -                              | Song et al. (2021)     |
| India             | Urban (two) and rural (one) area | 2013-2014            | 12                 | 43.71;<br>54.59;<br>22.4  | 177.05;<br>218.49;<br>68.22 | -                              | Kumar et al. (2018)    |
| Houston           | Industrial area                  | Wintertime of 2018   | 48                 | 33.92                     | -                           | -                              | Sadeghi et al. (2021)  |
| Shanghai          | Urban area                       | Jan.-Mar. 2019       | 43                 | 22.64;<br>21.36;<br>11.93 | 50.89;<br>33.94;<br>24.26   | 1.00;<br>0.46;<br>0.41         | this study             |

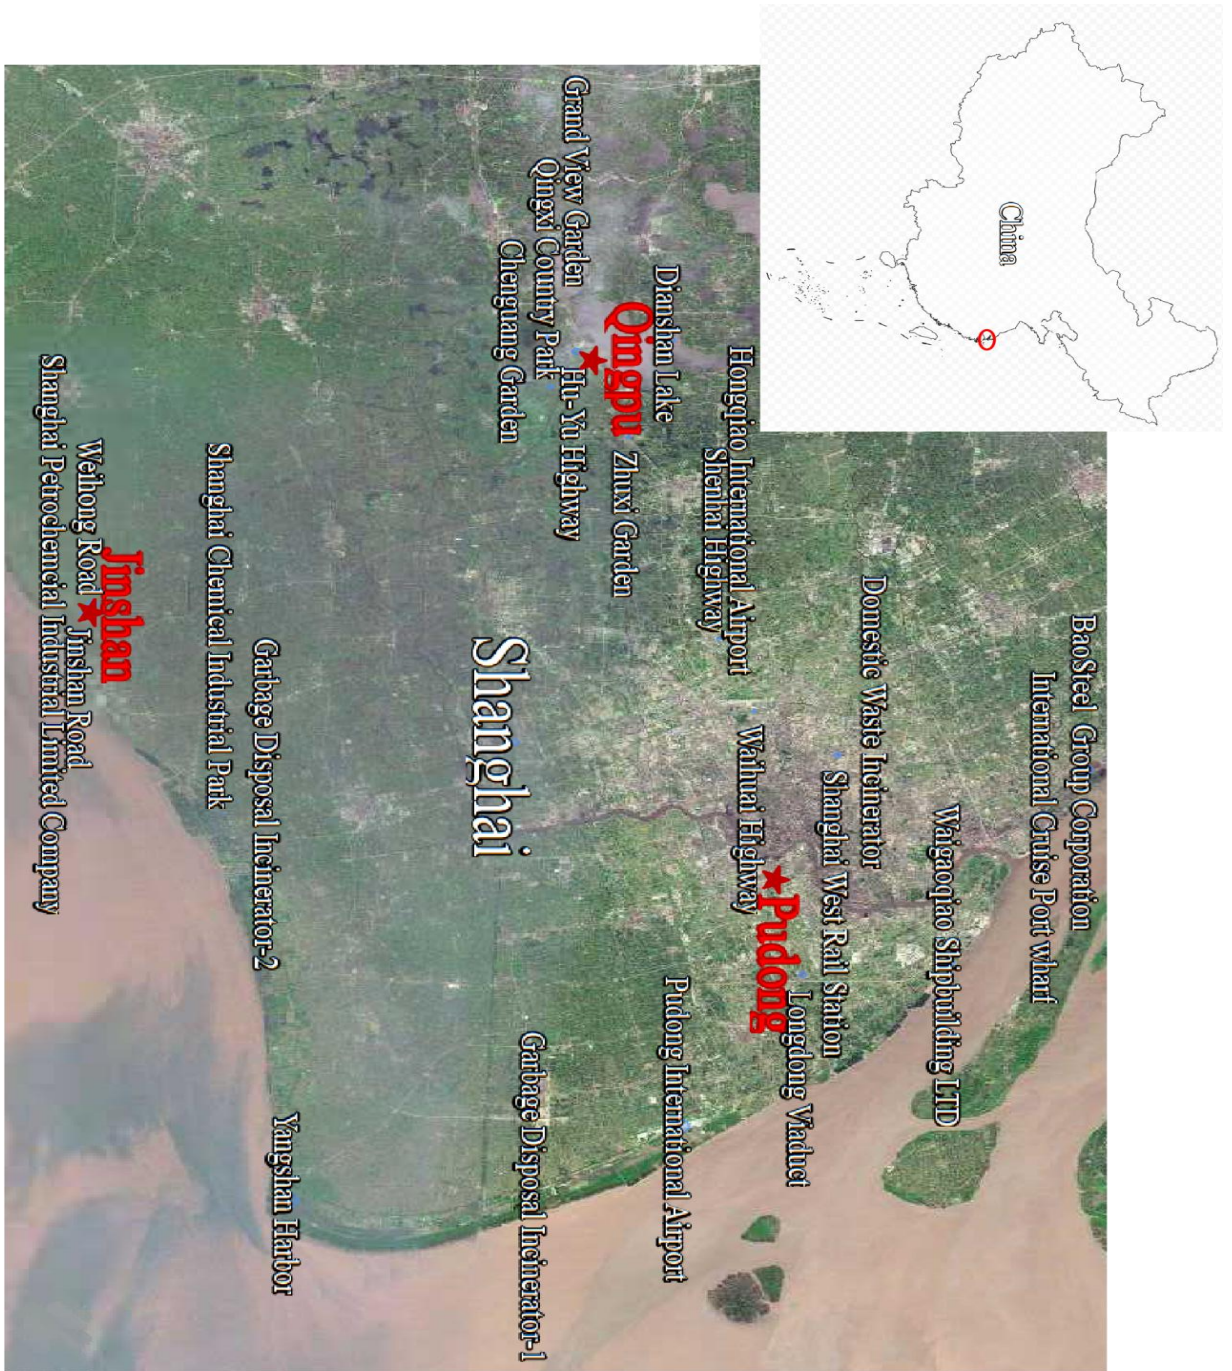

Figure S1. Locations of three sampling sites (© Google Earth).

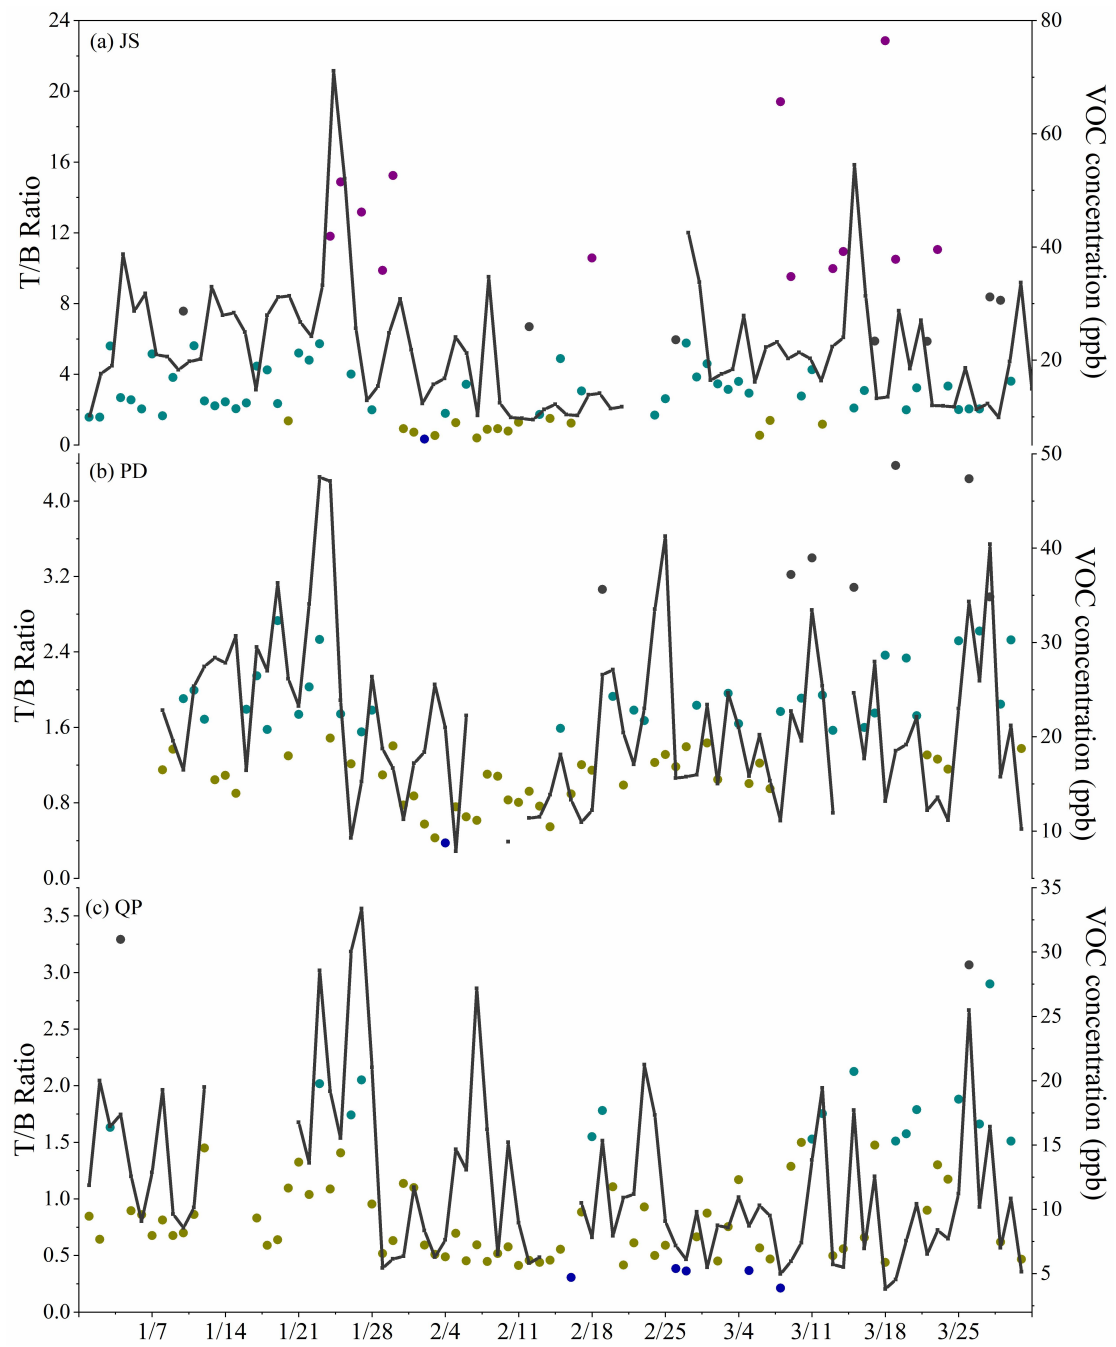

**Figure S2. The spatio-temporal variations of T/B ratios at the JS (a), PD (b) and QP (c) sites.**

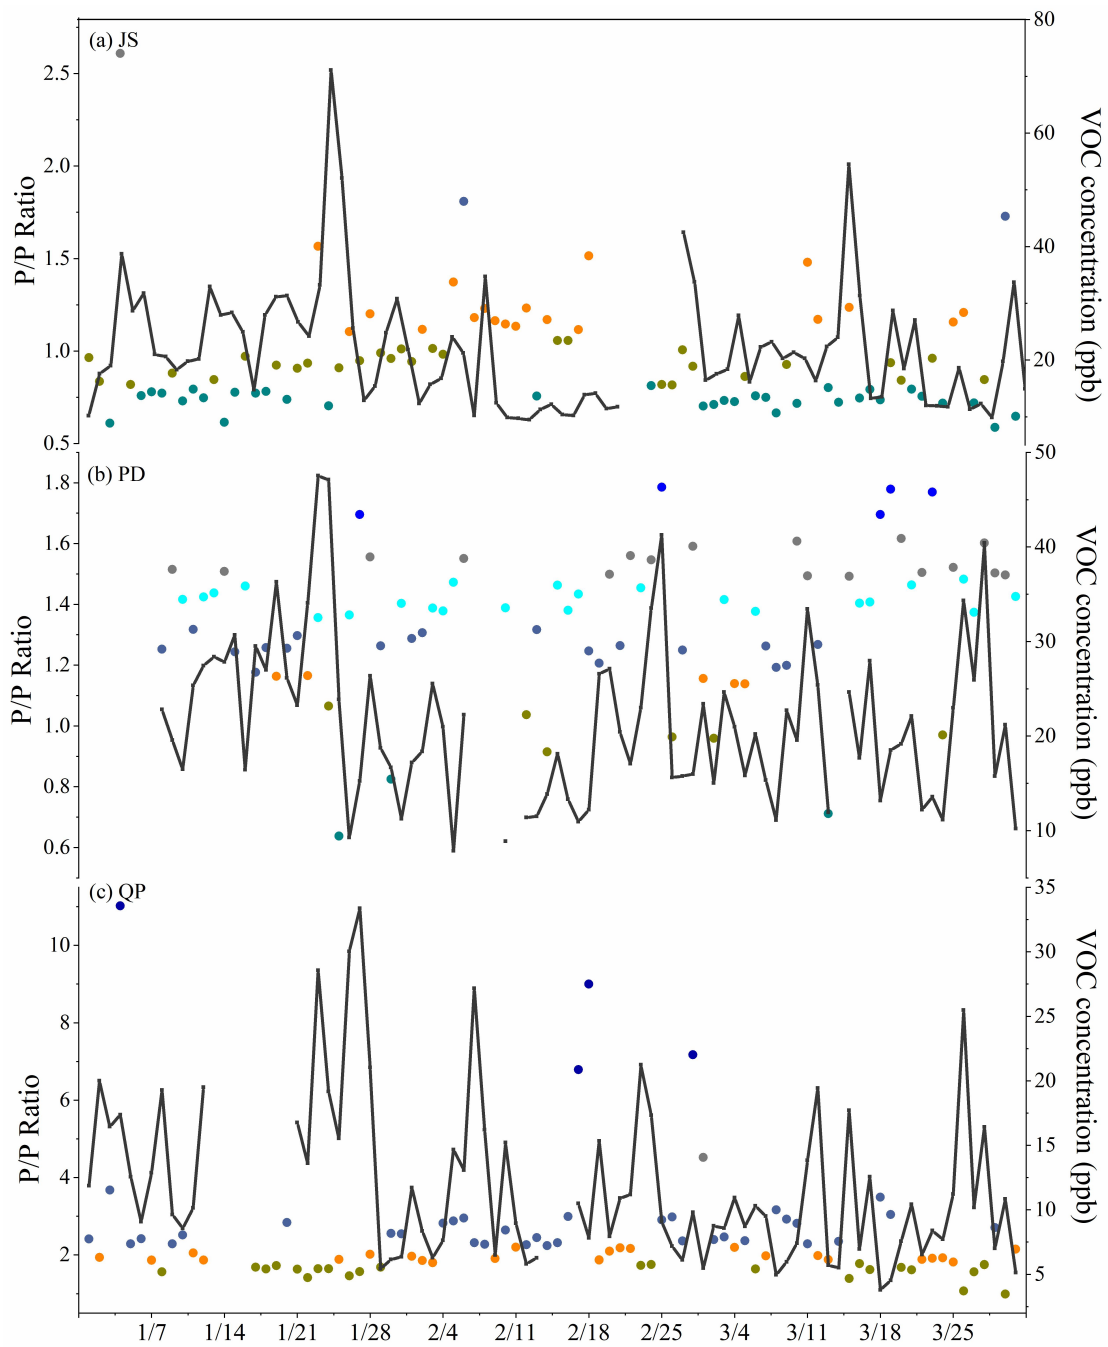

**Figure S3. The spatio-temporal variations of P/P ratios at the JS (a), PD (b) and QP (c) sites.**

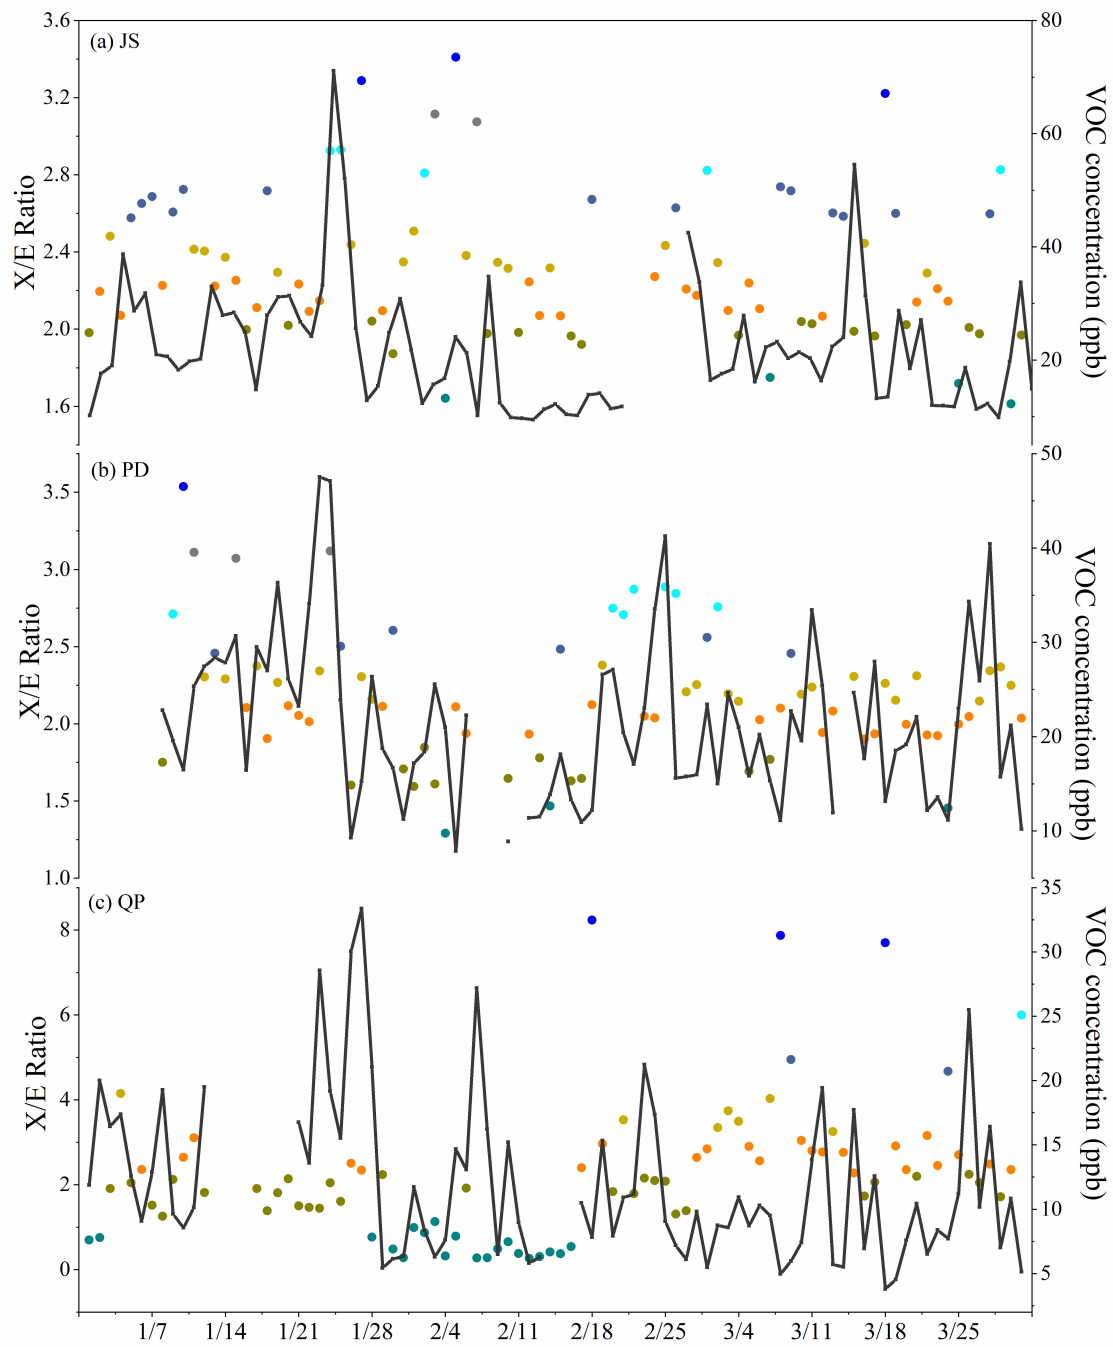

**Figure S4.** The spatio-temporal variations of X/E ratios at the JS (a), PD (b) and QP (c) sites.



(a) JS

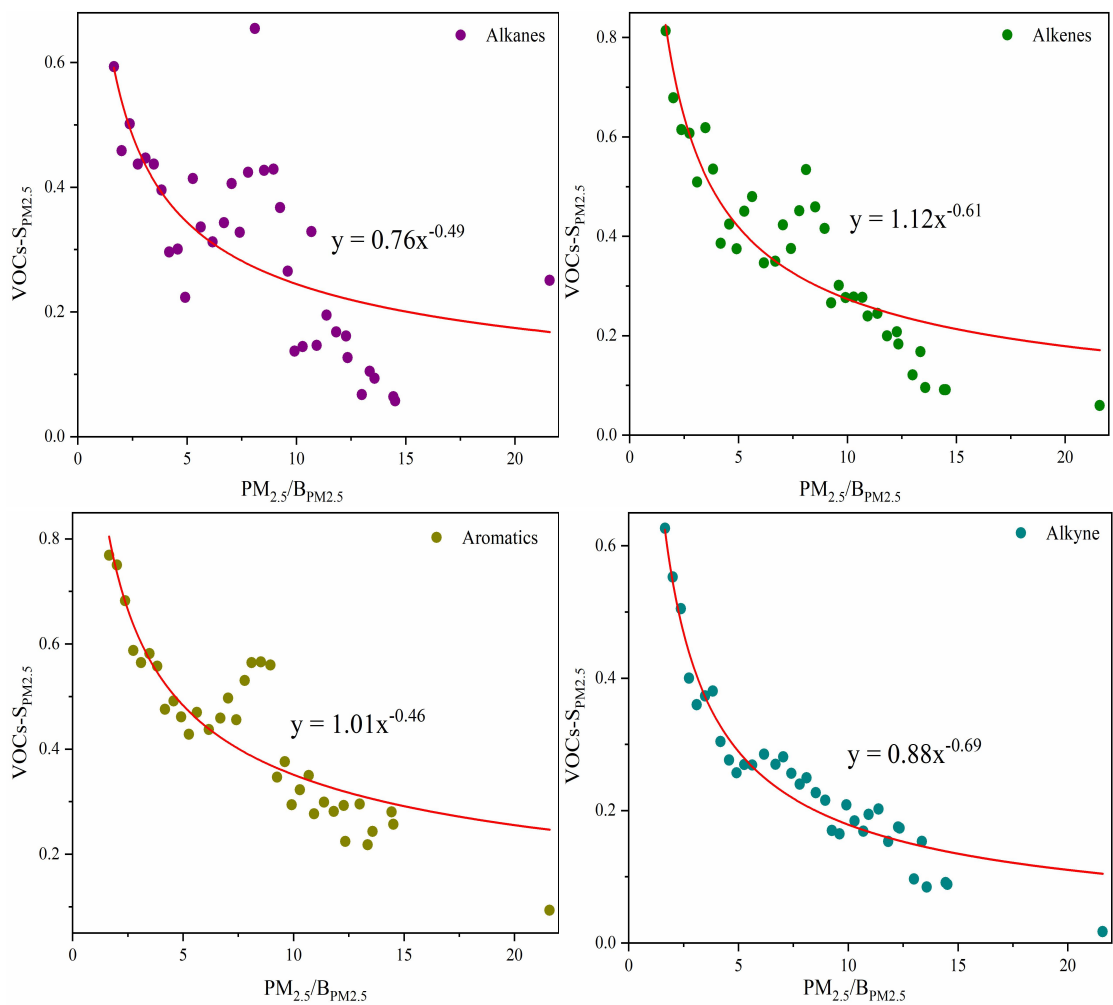

(b) PD

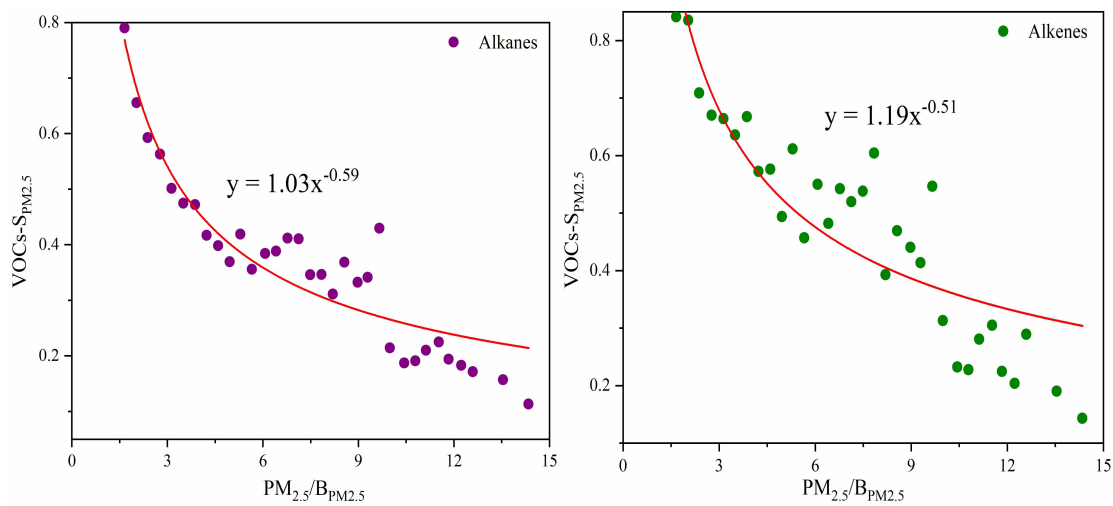

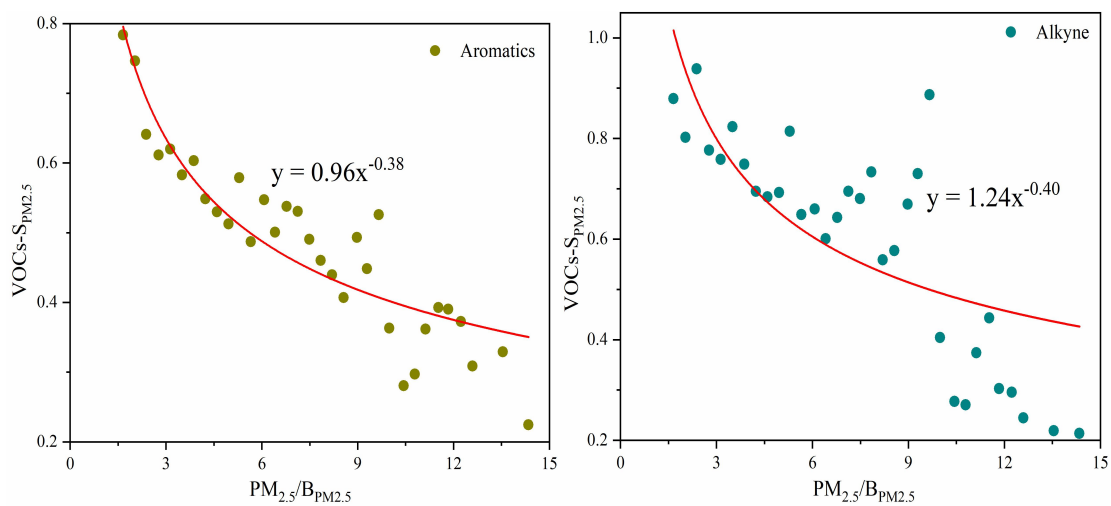

(c) QP

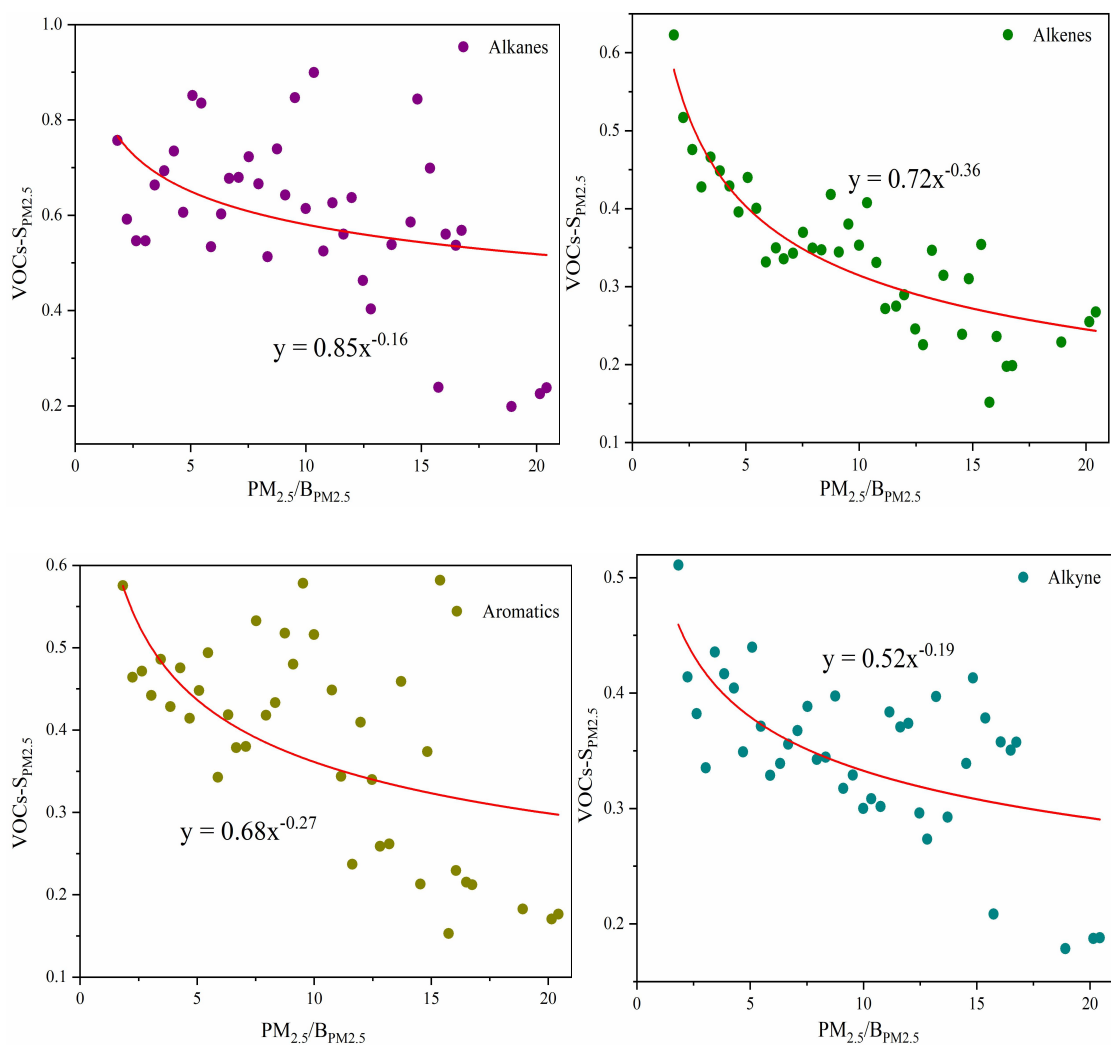

Figure S5. VOCs- $S_{PM_{2.5}}$  values for alkanes (purple), alkenes (green), aromatics (yellow) and alkyne (blue) at the JS (a), PD (b) and QP (c) sites.

## References

- An, J. L., Wang, J. X., Zhang, Y. X., and Zhu, B.: Source Apportionment of Volatile Organic Compounds in an Urban Environment at the Yangtze River Delta, China, *Arch. Environ. Con. Tox.*, 72(3), 335-348, [doi:10.1007/s00244-017-0371-3](https://doi.org/10.1007/s00244-017-0371-3), 2017.
- Hui, L. R., Liu, X. G., Tan, Q. W., Feng, M., An, J. L., Qu, Y., Zhang, Y. H., and Jiang, M. Q.: Characteristics, source apportionment and contribution of VOCs to ozone formation in Wuhan, Central China, *Atmos. Environ.*, 192, 55-71, [doi:10.1016/j.atmosenv.2018.08.042](https://doi.org/10.1016/j.atmosenv.2018.08.042), 2018.
- Kumar, A., Singh, D., Kumar, K. S., Singh, B. B., and Jain, V. K.: Distribution of VOCs in urban and rural atmospheres of subtropical India: Temporal variation, source attribution, ratios, OFP and risk assessment, *Sci. Total Environ.*, 613-614, 492-501, [doi:10.1016/j.scitotenv.2017.09.096](https://doi.org/10.1016/j.scitotenv.2017.09.096), 2018.
- Mozaffar, A., Zhang, Y. L., Fan, M. Y., Cao, F., and Lin, Y. C.: Characteristics of summertime ambient VOCs and their contributions to O<sub>3</sub> and SOA formation in a suburban area of Nanjing, China, *Atmos. Res.*, 240, 104923, 1-16, [doi:10.1016/j.atmosres.2020.104923](https://doi.org/10.1016/j.atmosres.2020.104923), 2020.
- Sadeghi, B., Pouyaei, A., Choi, Y. S., and Rappenglueck, B. H.: Measurement report: Summertime and wintertime VOCs in Houston: Source apportionment and spatial distribution of source origins, *Atmos. Chem. Phys. Discussion*, 2021, 565, 1-27, [doi:10.5194/acp-2021-565](https://doi.org/10.5194/acp-2021-565), 2021.
- Song, M. D., Li, X., Yang, S. D., Yu, X. N., Zhou, S. X., Yang, Y. M., Chen, S. Y., Dong, H. B., Liao, K. R., Chen, Q., Lu, K. D., Zhang, N. N., Cao, J. J., Zeng, L. M., and Zhang, Y. H.: Spatiotemporal variation, sources, and secondary transformation potential of volatile organic compounds in Xi'an China, *Atmos. Chem. Phys.*, 21, 4939-4958, [doi:10.5194/acp-21-4939-2021](https://doi.org/10.5194/acp-21-4939-2021), 2021.
- Vo, T. D. H., Lin, C. S., Weng, C. E., Yuan, C. S., Lee, C. W., Hung, C. H., Bui, X. T., Lo, K. C., and Lin, J. X.: Vertical stratification of volatile organic compounds and their photochemical product formation potential in an industrial area, *J. Environ. Manag.*, 217, 327-336, [doi:10.1016/j.jenvman.2018.03.101](https://doi.org/10.1016/j.jenvman.2018.03.101), 2018.
- Zhang, G., Wang, N., Jiang, X., and Zhao, Y.: Characterization of ambient volatile organic compounds (VOCs) in the area adjacent to a petroleum refinery in Jinan, China, *Aerosol Air Qual. Res.*, 17(4), 944-950, [doi:10.4209/aaqr.2016.07.0303](https://doi.org/10.4209/aaqr.2016.07.0303), 2017.
- Zhang, K., Li, L., Huang, L., Wang, Y. J., Huo, J. T., Duan, Y. S., Wang, Y. H., and Fu, Q. Y.: The impact of volatile organic compounds on ozone formation in the suburban area of Shanghai, *Atmos. Environ.*, 232(137617), 1-11, [doi:10.1016/j.atmosenv.2020.117511](https://doi.org/10.1016/j.atmosenv.2020.117511), 2020a.
- Zhang, Y. C., Li R., Fu H. B., Zhou D., and Chen J. M.: Observation and analysis of atmospheric volatile organic compounds in a typical petrochemical area in Yangtze River Delta, China, *J. Environ. Sci.*, 71, 233-248, [doi:CNKI:SUN:HJKB.0.2018-09-022](https://doi.org/CNKI:SUN:HJKB.0.2018-09-022), 2018.
